# Supplementary material for: CCR5 is a prognostic biomarker and an immune regulator for triple negative breast cancer
Source: Aging (Albany NY). 2021 Oct 30;13(20):23810–30. doi: 10.18632/aging.203654 (PMC8580338; doi:10.18632/aging.203654)
Supplement: Supplementary Table 1 [file aging-13-203654-s002.xlsx]

## Sheet: Supplementary Table 1
Supplementary Table 1. Differentially protein changes between CCR5 high and low groups.
Protein	logFC	t	P.Value	adj.P.Val	B
LCK|Lck	-0.5167	-6.26443	4.83e-09	1.09e-06	10.1911
CASP7|Caspase-7_cleavedD198	-0.913073	-6.12154	9.76e-09	1.1e-06	9.50721
IRF1|IRF-1	-0.268778	-5.33563	3.99e-07	3.01e-05	5.91291
PREX1|PREX1	-0.314188	-4.16174	5.64e-05	0.00318684	1.17047
ETS1|ETS-1	-0.38271	-3.88752	0.000159228	0.00719709	0.18944
AXL|Axl	-0.208487	-3.70727	0.000327653	0.0123416	-0.401448
TUBA1B|Acetyl-a-Tubulin-Lys40	0.52186	3.54519	0.0005424	0.0175118	-0.959965
JAK2|Jak2	-0.221972	-3.47777	0.000683976	0.0177062	-1.17609
IGFBP2|IGFBP2	0.496655	3.46675	0.00071019	0.0177062	-1.21109
SYK|Syk	-0.490484	-3.43786	0.000783461	0.0177062	-1.30241
PIK3R1 PIK3R2|PI3K-p85	-0.19667	-3.20779	0.00167651	0.0344446	-2.00656
BCL2L11|Bim	-0.264694	-3.11428	0.00225925	0.0425493	-2.28088
YAP1|YAP_pS127	0.32198	3.03983	0.00285181	0.0495777	-2.49425
FN1|Fibronectin	0.340247	2.99263	0.0032987	0.0532505	-2.62722
NDRG1|NDRG1_pT346	0.49365	2.93046	0.0039858	0.0600527	-2.79957
ITGA2|CD49b	0.203215	2.90018	0.00436592	0.0616686	-2.88235
MAPK9|JNK2	-0.166168	-2.6221	0.00975937	0.129723	-3.60694
MAP2K1|MEK1	-0.178444	-2.60159	0.0103319	0.129723	-3.6578
SRC|Src_pY416	-0.163301	-2.55598	0.0117146	0.137654	-3.7696
CDKN1B|p27_pT198	-0.0945572	-2.53385	0.0124435	0.137654	-3.8232
ARAF|A-Raf	-0.110746	-2.5237	0.0127909	0.137654	-3.84762
ERBB3|HER3	0.171912	2.48366	0.0142491	0.146377	-3.94319
RAB25|Rab25	0.291012	2.46478	0.0149863	0.146951	-3.98774
PARK7|DJ-1	-0.143573	-2.44325	0.0158689	0.146951	-4.0382
ACACA|ACC1	0.266803	2.43415	0.0162557	0.146951	-4.0594
TSC1|TSC1	0.159661	2.30176	0.0229049	0.199097	-4.35962
BCL2|Bcl-2	-0.209389	-2.28478	0.0239111	0.200145	-4.397
BAX|Bax	-0.126939	-2.2702	0.0248057	0.200217	-4.4289
CDKN1B|p27	-0.1311	-2.21862	0.0282108	0.21985	-4.54024
ACACA ACACB|ACC_pS79	0.240898	2.19018	0.0302571	0.222859	-4.60061
RAF1|C-Raf	-0.0927478	-2.18599	0.0305692	0.222859	-4.60945
ARAF|A-Raf_pS299	0.106156	2.16372	0.0322755	0.227946	-4.65613
PRDX1|PRDX1	-0.130548	-2.11585	0.0362238	0.248078	-4.75496
RICTOR|Rictor	0.197136	2.09144	0.0383935	0.255204	-4.80457
MS4A1|CD20	-0.0878503	-2.05949	0.0414005	0.26571	-4.86867
RB1|Rb_pS807_S811	0.221085	2.03987	0.0433461	0.26571	-4.9076
ACVRL1|ACVRL1	-0.0747109	-2.03568	0.0437708	0.26571	-4.91585
RAD50|Rad50	-0.104758	-2.02687	0.0446768	0.26571	-4.93318
DIABLO|Smac	-0.159918	-2.0114	0.046307	0.268343	-4.96344
GSK3A GSK3B|GSK3_pS9	0.226475	1.86396	0.0645349	0.352585	-5.24077
XRCC5|Ku80	0.139262	1.85993	0.0651073	0.352585	-5.24807
BRAF|B-Raf	0.179485	1.83978	0.0680327	0.352585	-5.28435
FASN|FASN	0.349406	1.83809	0.0682829	0.352585	-5.28737
BCL2A1|Bcl2A1	-0.126922	-1.83566	0.0686449	0.352585	-5.29173
EPPK1|EPPK1	0.435515	1.80726	0.0729844	0.362853	-5.3421
PDCD4|PDCD4	0.187137	1.80174	0.073855	0.362853	-5.35181
RPS6KB1|p70S6K_pT389	-0.105118	-1.78013	0.0773418	0.366848	-5.38954
CDH2|N-Cadherin	-0.130972	-1.77665	0.0779147	0.366848	-5.39556
EIF4E|eIF4E	-0.0722339	-1.74915	0.0825758	0.379172	-5.44287
DPP4|CD26	-0.0789248	-1.74163	0.0838876	0.379172	-5.45566
MSH6|MSH6	0.220299	1.70717	0.0901273	0.399388	-5.51369
BCL2L1|Bcl-xL	-0.0565062	-1.68117	0.0950803	0.413233	-5.55674
SERPINE1|PAI-1	0.227539	1.66713	0.0978459	0.41723	-5.57972
PRKCD|PKC-delta_pS664	-0.054361	-1.63286	0.104867	0.430786	-5.63504
RPTOR|Raptor	0.0720561	1.63249	0.104945	0.430786	-5.63563
MYH9|Myosin-IIa_pS1943	0.122704	1.62348	0.106857	0.430786	-5.64998
CASP9|Caspase-9	-0.0939986	-0.668204	0.514278	0.745819	-5.65126
DVL3|Dvl3	0.104287	1.61516	0.10865	0.430786	-5.66318
ANXA7|Annexin_VII	-0.0452189	-1.55778	0.121665	0.453082	-5.75236
GSK3A GSK3B|GSK3-alpha-beta	0.0820579	1.55634	0.122008	0.453082	-5.75456
ENY2|ENY2	0.110192	1.49974	0.136499	0.466799	-5.75568
PRKAA1|AMPK_alpha	0.0659714	1.54832	0.123926	0.453082	-5.76677
EIF4EBP1|4E-BP1_pT37_T46	0.171198	1.54781	0.124047	0.453082	-5.76754
SLC1A5|SLC1A5	0.157926	1.49148	0.13865	0.466799	-5.76776
MSH2|MSH2	0.140014	1.54678	0.124297	0.453082	-5.76911
CTNNB1|beta-Catenin	0.232181	1.53441	0.127307	0.456687	-5.78779
NFKB1|NF-kB-p65_pS536	-0.200841	-1.49837	0.136411	0.466799	-5.84144
KDR|VEGFR2	0.123854	1.48591	0.139672	0.466799	-5.85968
PXN|Paxillin	0.127684	1.48154	0.14083	0.466799	-5.86605
MAPK14|p38_MAPK	-0.0609898	-1.47474	0.142649	0.466799	-5.87592
MET|c-Met	0.0947746	1.45737	0.147375	0.466799	-5.90095
RBM15|RBM15	0.203143	1.454	0.148305	0.466799	-5.90576
EEF2|eEF2	-0.124182	-1.45252	0.148715	0.466799	-5.90787
CDH1|E-Cadherin	0.214631	1.41878	0.158305	0.490094	-5.95549
CHEK2|Chk2_pT68	0.0670346	1.41085	0.160627	0.490562	-5.96653
YWHAB|14-3-3_beta	-0.0499834	-1.39932	0.164049	0.494334	-5.98247
YAP1|YAP	0.0735061	1.37909	0.170186	0.506078	-6.01013
CHEK2|Chk2	0.0961149	1.36373	0.17496	0.51352	-6.03087
CTNNA1|alpha-Catenin	-0.0632179	-0.147516	0.884079	0.958704	-6.04501
NKX2-1|TTF1	0.007174	0.121328	0.904542	0.959749	-6.04849
PECAM1|CD31	-0.0553401	-1.33643	0.183694	0.531426	-6.06716
STAT5A|STAT5-alpha	-0.235248	-1.32695	0.1868	0.531426	-6.07959
MYH11|MYH11	0.37226	1.32298	0.188116	0.531426	-6.08478
PRKCB|PKC-pan_BetaII_pS660	-0.136848	-1.26918	0.206595	0.572012	-6.15352
SRC|Src_pY527	0.14388	1.26511	0.208046	0.572012	-6.15862
ERRFI1|MIG-6	0.0536947	1.25945	0.210075	0.572012	-6.16566
TP53|p53	-0.110538	-1.24738	0.214452	0.576977	-6.18059
CDH3|P-Cadherin	0.048057	1.21739	0.225614	0.597878	-6.21708
FOXO3|FOXO3a	0.0478421	1.20372	0.230838	0.597878	-6.23342
KIT|c-Kit	0.186601	1.19887	0.232713	0.597878	-6.23917
SMAD4|Smad4	0.0364392	1.19864	0.232802	0.597878	-6.23945
TP53BP1|53BP1	0.096978	1.16497	0.24612	0.616597	-6.27876
TSC2|Tuberin_pT1462	0.062218	1.16013	0.248079	0.616597	-6.28433
EGFR|EGFR_pY1173	0.0583538	1.15964	0.248276	0.616597	-6.28488
KAT2A|GCN5L2	0.0942935	1.07697	0.283811	0.647494	-6.29114
SQSTM1|p62-LCK-ligand	-0.128	-1.1321	0.259631	0.637788	-6.31608
RPS6KB1|p70S6K	0.0802017	1.1168	0.266095	0.646152	-6.33309
ERCC5|ERCC5	-0.0730785	-1.10452	0.271366	0.646152	-6.34659
IRS1|IRS1	-0.0641616	-1.10395	0.271613	0.646152	-6.34722
SHC1|Shc_pY317	0.0492041	1.08014	0.282037	0.647494	-6.37294
YBX1|YB-1_pS102	0.0476226	1.07956	0.282296	0.647494	-6.37356
ESR1|ER-alpha	-0.147743	-1.07367	0.284916	0.647494	-6.37983
AKT1 AKT2 AKT3|Akt	0.101498	1.07013	0.286502	0.647494	-6.38359
ATM|ATM	-0.145672	-1.06295	0.289732	0.648311	-6.39117
ANXA1|Annexin-1	-0.119664	-1.05509	0.293298	0.649857	-6.39941
PARP1|PARP1	-0.11643	-0.513043	0.609811	0.791827	-6.42473
RAF1|C-Raf_pS338	0.0364633	1.03027	0.304758	0.653049	-6.42505
GATA3|GATA3	-0.111939	-1.02746	0.306071	0.653049	-6.42791
ABL1|c-Abl	-0.0436812	-1.02335	0.308002	0.653049	-6.43208
CHEK1|Chk1_pS296;CHEK1|CHK1_pS296	-0.0413215	-1.01839	0.310345	0.653049	-6.4371
CCNE1|Cyclin_E1	-0.130453	-1.0178	0.310623	0.653049	-6.43769
TIGAR|TIGAR	-0.0590146	-1.01474	0.312076	0.653049	-6.44078
AKT1S1|PRAS40_pT246	0.0371773	0.988745	0.324586	0.670913	-6.46658
SRC|Src	0.0625447	0.978173	0.329767	0.670913	-6.47689
HSPA1A|HSP70	-0.164493	-0.975249	0.331209	0.670913	-6.47972
STK11|LKB1	-0.0477005	-0.967793	0.334907	0.670913	-6.4869
PEA15|PEA15_pS116	-0.0634227	-0.954469	0.34158	0.670913	-6.4996
CDKN1B|p27_pT157	-0.035047	-0.954003	0.341815	0.670913	-6.50004
ERBB2|HER2	0.0892729	0.949197	0.344245	0.670913	-6.50457
ESR1|ER-alpha_pS118	0.0388143	0.936144	0.350898	0.670913	-6.51678
MAPK1 MAPK3|MAPK_pT202_Y204	0.132735	0.933355	0.35233	0.670913	-6.51936
GSK3A GSK3B|GSK3-alpha-beta_pS21_S9	0.118101	0.931528	0.353271	0.670913	-6.52105
STAT3|STAT3_pY705	-0.0550982	-0.929718	0.354204	0.670913	-6.52272
CDK1|CDK1	-0.0355921	-0.919319	0.359595	0.670913	-6.53226
EIF4EBP1|4E-BP1_pS65	0.0451645	0.913061	0.362865	0.670913	-6.53795
YWHAE|14-3-3_epsilon	0.0251963	0.911853	0.363498	0.670913	-6.53904
GAB2|GAB2	0.0984212	0.908722	0.365143	0.670913	-6.54187
PTPN11|SHP-2_pY542	0.0482521	0.902834	0.368249	0.671163	-6.54716
CDKN2A|P16INK4A;CDKN2A|p16_INK4a	0.150438	0.889012	0.375604	0.679092	-6.55945
SNAI1|Snail	0.0536455	0.879007	0.380985	0.683354	-6.56823
YWHAZ|14-3-3_zeta	-0.0608664	-0.870736	0.385469	0.685953	-6.57542
COL6A1|Collagen_VI	-0.110896	-0.855244	0.393956	0.689234	-6.58869
WWTR1|TAZ	0.0424722	0.849925	0.396896	0.689234	-6.59319
SRSF1|SF2	0.0364693	0.845315	0.399455	0.689234	-6.59708
EIF4G1|eIF4G	0.0724063	0.840855	0.401941	0.689234	-6.60081
PARP1|PARP_cleaved	0.0621566	0.836809	0.404203	0.689234	-6.60418
TSC2|Tuberin	0.0656862	0.825792	0.410403	0.689234	-6.61328
PEA15|PEA15	-0.0442628	-0.821842	0.41264	0.689234	-6.61651
PIK3CA |PI3K-p110-alpha	0.0517928	0.820161	0.413594	0.689234	-6.61788
RICTOR|Rictor_pT1135	0.0388194	0.816002	0.41596	0.689234	-6.62126
PDK1|PDK1_pS241	0.0473167	0.812589	0.417908	0.689234	-6.62402
IGFR1|IGF1R_pY1135_Y1136	-0.0355616	-0.807435	0.420859	0.689234	-6.62817
SMAD3|Smad3	-0.0419838	-0.792846	0.429282	0.695516	-6.63977
CCNB1|Cyclin_B1	0.115425	0.790146	0.430851	0.695516	-6.64189
GATA6|GATA6	0.0415015	0.661881	0.509409	0.745819	-6.64881
SMAD1|Smad1	0.0400928	0.779019	0.437355	0.697986	-6.65057
RPS6|S6	0.101031	0.775423	0.439468	0.697986	-6.65335
BIRC2 |cIAP	0.032306	0.763524	0.446505	0.697986	-6.66245
MTOR|mTOR	0.0517797	0.763462	0.446542	0.697986	-6.6625
INPP4B|INPP4B	-0.0843968	-0.759792	0.448725	0.697986	-6.66527
TFRC|TFRC	-0.130795	-0.756128	0.450911	0.697986	-6.66804
CASP3|Caspase-3	-0.0492859	-0.750159	0.454486	0.698734	-6.67251
PDK1|PDK1	-0.0265234	-0.742107	0.459333	0.701414	-6.67848
PTEN|PTEN	-0.0910833	-0.735656	0.463237	0.702628	-6.68322
RB1|Rb	0.032995	0.704294	0.482483	0.726941	-6.70568
MET|c-Met_pY1235	0.0200753	0.699007	0.48577	0.727046	-6.70937
MAPK14|p38_pT180_Y182	-0.0672313	-0.688358	0.492428	0.732162	-6.71672
AR|AR	-0.0966683	-0.662093	0.509059	0.745819	-6.73436
AKT1 AKT2 AKT3|Akt_pT308	0.102375	0.653112	0.514813	0.745819	-6.74024
MYC|c-Myc	0.0655057	0.64248	0.521669	0.750938	-6.7471
BRD4|BRD4	0.0703313	0.635948	0.525905	0.751714	-6.75125
PCNA|PCNA	0.0290381	0.62748	0.531422	0.751714	-6.75658
BRAF|B-Raf_pS445	0.035832	0.626309	0.532187	0.751714	-6.75731
RAD51|Rad51	-0.0383228	-0.615525	0.539261	0.756975	-6.76397
PRKAA1|AMPK_pT172	-0.0574297	-0.597732	0.551037	0.76873	-6.77472
CASP8|Caspase-8	0.0277829	0.586555	0.558498	0.77436	-6.78131
BID|Bid	-0.0293849	-0.578438	0.563948	0.777148	-6.78602
AKT1 AKT2 AKT3|Akt_pS473	0.100972	0.560965	0.575767	0.779568	-6.79594
PRKCA |PKC-alpha_pS657	-0.0407352	-0.559586	0.576704	0.779568	-6.79671
SETD2|SETD2	0.0244841	0.556129	0.579058	0.779568	-6.79863
DIRAS3|DIRAS3	0.0290221	0.549962	0.583269	0.779568	-6.80203
RPS6KA1|p90RSK	0.0339456	0.547236	0.585135	0.779568	-6.80351
JUN|c-Jun_pS73	-0.0231882	-0.541937	0.58877	0.779568	-6.80639
FOXM1|FoxM1	0.0556413	0.540365	0.58985	0.779568	-6.80724
FOXO3|FOXO3a_pS318_S321	-0.0163328	-0.534882	0.593625	0.779996	-6.81017
EGFR|EGFR_pY1068	0.0510771	0.528243	0.598212	0.781479	-6.81369
COG3|COG3	0.0329385	0.506793	0.61314	0.791827	-6.82475
BRCA2|BRCA2	0.0201671	0.49719	0.619877	0.795978	-6.82956
NOTCH1|Notch1	-0.0243699	-0.48221	0.630451	0.804982	-6.83687
CLDN7|Claudin-7	0.0782932	0.446087	0.656261	0.82983	-6.85358
MYH9|Myosin-IIa	-0.00888354	-0.150658	0.880517	0.958704	-6.8557
YBX1|YB-1	-0.0229373	-0.435702	0.66376	0.82983	-6.85815
NRAS|N-Ras	0.0201209	0.432824	0.665845	0.82983	-6.85939
GUSP4|DUSP4	0.044688	0.430835	0.667287	0.82983	-6.86025
CCNE2|Cyclin_E2	-0.0360372	-0.42948	0.66827	0.82983	-6.86083
CAV1|Caveolin-1	0.0754286	0.410975	0.681753	0.841946	-6.86858
MAP2K1|MEK1_pS217_S221	0.0326691	0.398801	0.69068	0.844621	-6.8735
MRE11A|Mre11	-0.0180016	-0.397832	0.691393	0.844621	-6.87389
EEF2K|eEF2K	-0.0279945	-0.351738	0.725592	0.881633	-6.89112
GAPDH|GAPDH	0.0815487	0.344422	0.731073	0.883543	-6.89366
ASNS|ASNS	0.035901	0.336591	0.736956	0.885916	-6.89632
BAP1|Bap1-c-4	0.0280296	0.326573	0.744505	0.890254	-6.89963
XBP1|XBP1	-0.0122855	-0.317153	0.751625	0.893215	-6.90266
XRCC1|XRCC1	0.015417	0.31285	0.754885	0.893215	-6.90401
BAK1|Bak	-0.0223122	-0.297794	0.766326	0.902029	-6.9086
NRG1|Heregulin	0.0168391	0.284	0.776853	0.909682	-6.9126
RPS6KA1|p90RSK_pT359_S363	0.0157792	0.276263	0.782776	0.910627	-6.91476
CDKN1A|p21	0.0158017	0.265101	0.791343	0.910627	-6.91778
BAD|Bad_pS112	0.013571	0.264523	0.791787	0.910627	-6.91793
COPS5|JAB1	0.0142706	0.261936	0.793777	0.910627	-6.91861
ARID1A|ARID1A	0.0116504	0.253419	0.800336	0.913515	-6.9208
CCND1|Cyclin_D1	0.00928114	0.234965	0.814598	0.925121	-6.9253
ERCC1|ERCC1	0.0118073	0.215152	0.829979	0.931843	-6.92975
MAPK8|JNK_pT183_pY185	0.00866236	0.208329	0.835291	0.931843	-6.93119
ADAR|ADAR1	0.0156874	0.203154	0.839325	0.931843	-6.93225
EIF4EBP1|4E-BP1	0.0201421	0.20147	0.840639	0.931843	-6.93259
SCD|SCD	0.0111147	0.200838	0.841133	0.931843	-6.93272
RPS6|S6_pS240_S244	-0.0219785	-0.167196	0.86747	0.956333	-6.9389
EIF4EBP1|4E-BP1_pT70	-0.00690858	-0.161437	0.871995	0.956655	-6.93984
G6PD|G6PD	0.0108898	0.139181	0.889518	0.958704	-6.94318
BECN1|Beclin	0.00521408	0.137126	0.891139	0.958704	-6.94347
MTOR|mTOR_pS2448	0.00566899	0.128593	0.897874	0.958704	-6.9446
MAPK1|ERK2	-0.0111915	-0.126768	0.899315	0.958704	-6.94483
PGR|PR	-0.00262138	-0.0936089	0.925561	0.973803	-6.94848
CHEK1|Chk1_pS345	-0.00424179	-0.0907649	0.927816	0.973803	-6.94874
EGFR|EGFR	-0.00798692	-0.0868028	0.930959	0.973803	-6.94909
ERBB3|HER3_pY1289	-0.00319858	-0.0770366	0.93871	0.973803	-6.94989
PRKCA |PKC-alpha	0.00600154	0.076254	0.939332	0.973803	-6.94995
ERBB2|HER2_pY1248	0.00372452	0.0570025	0.954629	0.985142	-6.95123
RAB11A RAB11B|Rab11	0.00223718	0.0367127	0.970769	0.993011	-6.95218
TGM2|Transglutaminase	-0.00177081	-0.0301349	0.976005	0.993011	-6.9524
RPS6|S6_pS235_S236	0.0032239	0.0279387	0.977753	0.993011	-6.95247
NF2|NF2	-0.00143215	-0.0211195	0.983182	0.993011	-6.95263
CHEK1|Chk1	-0.000948214	-0.0181964	0.985509	0.993011	-6.95269
CDK1|CDK1_pY15	0.000873123	0.0128098	0.989799	0.993011	-6.95277
STMN1|Stathmin	0.000480695	0.008776	0.993011	0.993011	-6.95282
